# Supplementary material for: High-responsivity β-Ga2O3/GaN heterojunction UV photodetectors with tunable multi-band detection capability
Source: Royal Society of Chemistry journal article supplement (doi:10.1039/d4ce01101e), 2024-12-19
Supplement: d4ce01101e1.pdf [file d4ce01101e1.pdf]

## Supplementary information

### High-responsivity $\beta$ -Ga<sub>2</sub>O<sub>3</sub>/GaN heterojunction UV photodetector with tunable multi-band detection capability

Yang Nan <sup>a</sup>, Chenxing Liu <sup>a</sup>, Hongchao Zhai <sup>a</sup>, Siyu Wu <sup>a</sup>, Zhengyuan Wu <sup>a</sup>, Pengfei Tian <sup>a</sup>, Daoyou Guo <sup>b</sup>, Weihua Tang <sup>c</sup>, Zhilai Fang <sup>a,\*</sup>

<sup>a</sup> School of Information Science and Technology, and Institute of Optoelectronics, Fudan University, Shanghai 200433, China

<sup>b</sup> Department of Physics, Zhejiang Sci-Tech University, Hangzhou 310018, China

<sup>c</sup> Innovation Center of Gallium Oxide Semiconductor (IC-GAO), College of Integrated Circuit Science and Engineering, Nanjing University of Posts and Telecommunications, Nanjing, Jiangsu 210023, China

\* E-mail address: [zlfang@fudan.edu.cn](mailto:zlfang@fudan.edu.cn)

---

\* Corresponding author.

E-mail address: [zlfang@fudan.edu.cn](mailto:zlfang@fudan.edu.cn)

## **Contents**

1. Simulated energy band structures under dark and illumination conditions at different bias

## 1. Simulated energy band structures under dark and illumination conditions at different bias

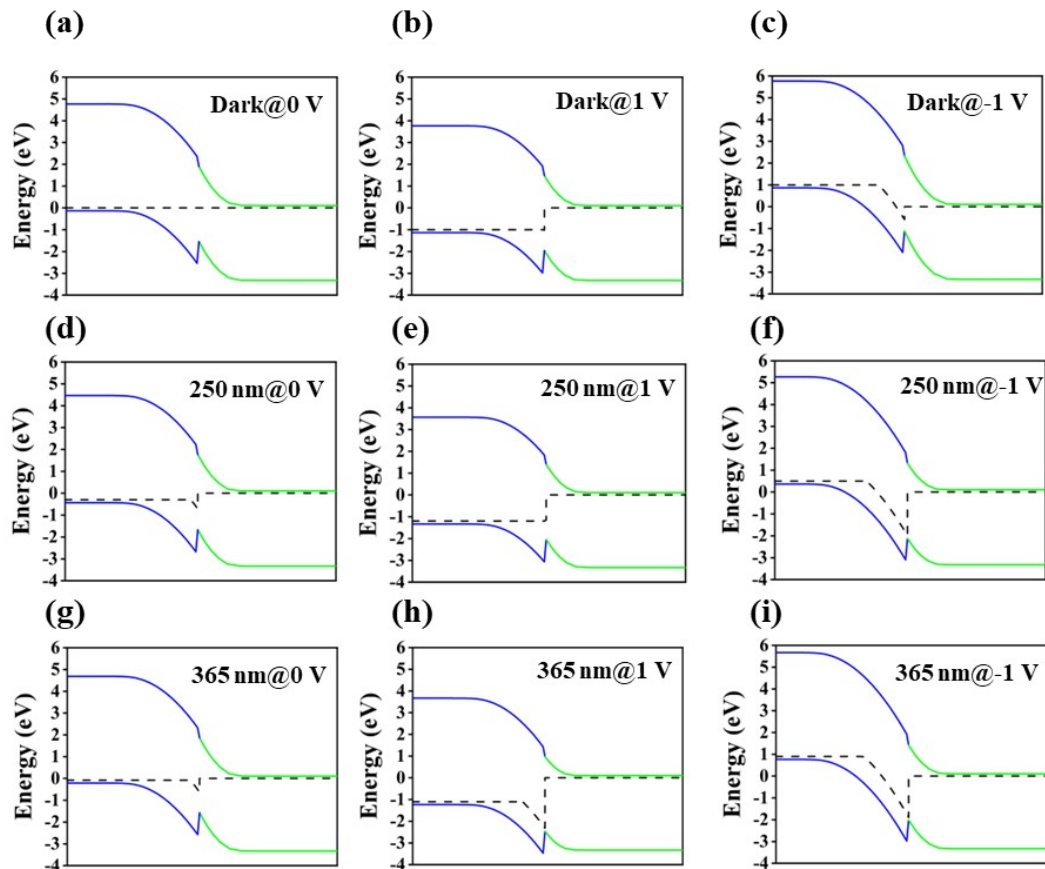

**Fig. S1.** Simulated energy band structures under dark conditions (after contact) at (a) 0 V, (b) 1 V and (c)  $-1$  V. Under 250 nm illumination conditions (after contact) at (d) 0 V, (e) 1 V and (f)  $-1$  V. Under 365 nm illumination conditions (after contact) at (g) 0 V, (h) 1 V and (i)  $-1$  V.

It depicts the variations in the energy band structure of the  $\beta$ -Ga<sub>2</sub>O<sub>3</sub>/GaN heterojunction under different biases and illumination. Simulation results show that the direction of the bias voltage applied to the device affects the heterojunction energy band structure differently: a forward bias voltage decreases the energy levels of  $\beta$ -Ga<sub>2</sub>O<sub>3</sub>, and vice versa. When the device is under UV illumination, the energy level difference between  $\beta$ -Ga<sub>2</sub>O<sub>3</sub> and GaN decreases.
